# Supplementary material for: Constitutive activated STAT3 is an essential regulator and therapeutic target in esophageal squamous cell carcinoma
Source: PubMed Central journal article supplement (PMC5687640; doi:10.18632/oncotarget.20838), 2017-09-12
Supplement: oncotarget-08-88719-s001.pdf [file oncotarget-08-88719-s001.pdf]

## Constitutive activated STAT3 is an essential regulator and therapeutic target in esophageal squamous cell carcinoma

### SUPPLEMENTARY MATERIALS

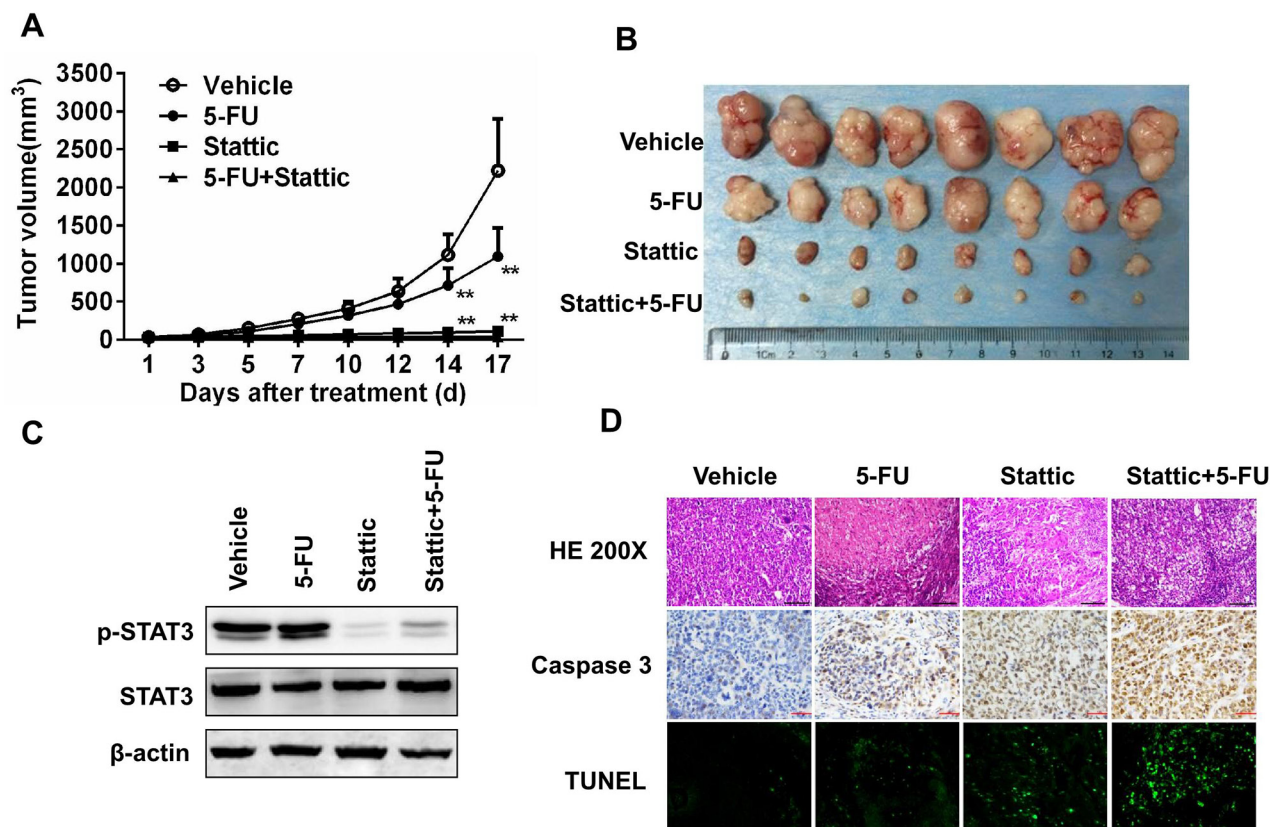

**Supplementary Figure 1: Xenografts from primary tumor EG37, which contained high level of pSTAT3, was sensitive to STAT3 inhibition.** (A) 8 Mice bearing PDX were treated with vehicle, 5-FU, Stattic, or 5FU+Stattic. While 5-FU alone inhibited tumor growth moderately, Stattic alone significantly inhibited the xenografts growth (\*\* $P < 0.01$  compared with vehicle group). (B) Photograph of tumors from the 4 groups at the end of the experiments. (C) Immunoblotting of STAT3 and pSTAT3, in the xenografts. Stattic markedly decreased pSTAT3 level. (D) Histological and immunohistochemical analysis of the xenografts. Compared with control, xenografts from Stattic and Stattic plus 5-FU-treated mice contained higher levels of activated caspase-3 and TUNEL<sup>+</sup> cells.

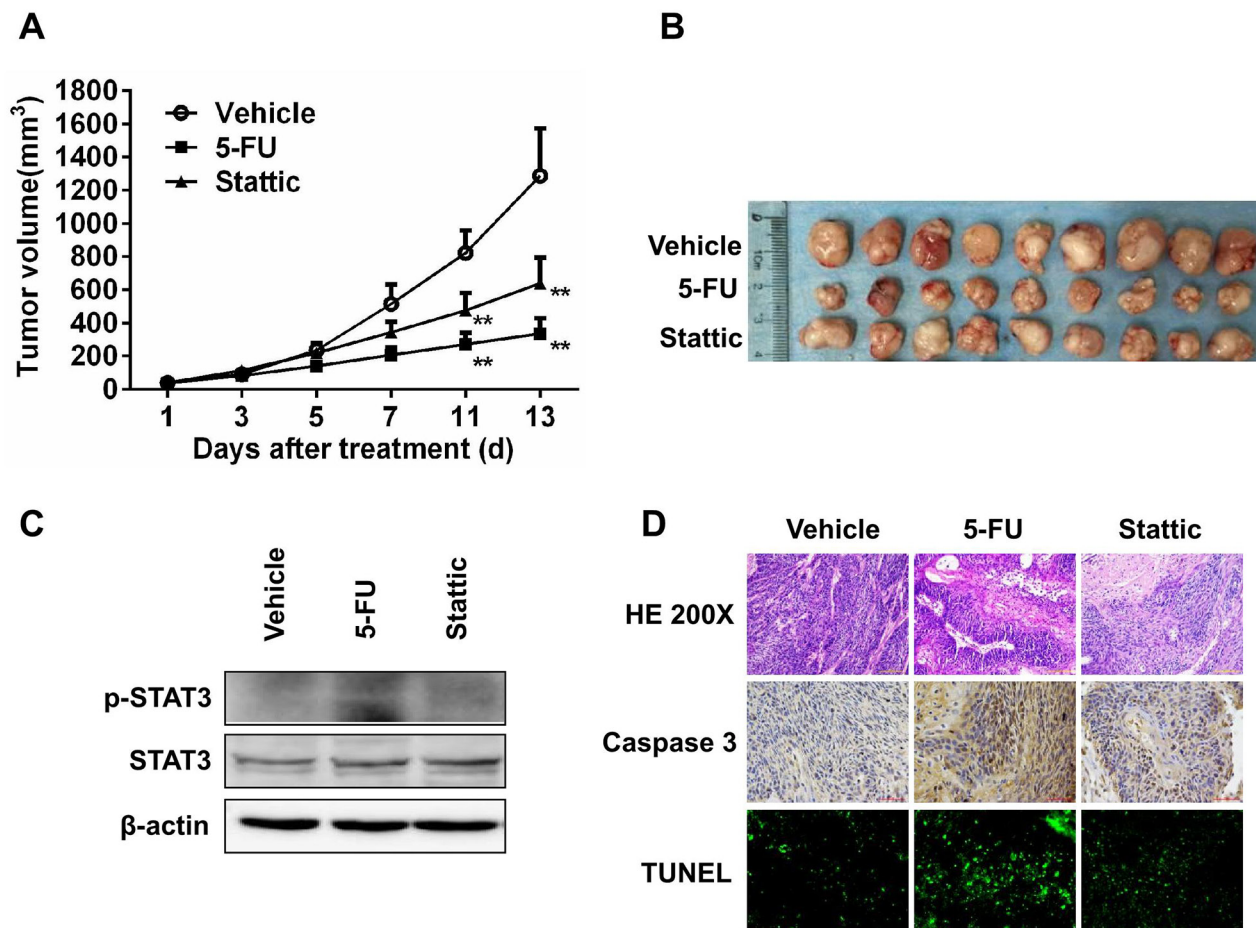

**Supplementary Figure 2: Xenografts from primary tumor EG14, which contained low level of pSTAT3, was relative insensitive to STAT3 inhibition.** (A) 8 Mice bearing the PDX were treated with vehicle, 5-FU, or Stattic. While 5-FU alone inhibited tumor growth significantly, Stattic alone only decreased the xenografts growth slightly (\*\*P<0.01 compared with vehicle group). (B) Photograph of tumors from the 3 groups at the end of the experiments. (C) Immunoblotting of STAT3 and pSTAT3 in the xenografts. (D) Histological and immunohistochemical analysis of the xenografts. Compared with control, xenografts from 5-FU-treated mice contained higher levels of activated caspase-3 and TUNEL+ cells, whereas were insignificant in these from Stattic-treated mice.

**Supplementary Table 1 : The clinicopathological patients with esophageal cancers.**

| <b>Number</b> | <b>Gender</b> | <b>Age</b> | <b>Tumor</b> | <b>Type</b> | <b>TNM staging</b> | <b>Tumor differentiation</b> |
|---------------|---------------|------------|--------------|-------------|--------------------|------------------------------|
| EG2           | Male          | 64         | Esophagus    | ESCC        | T2N0M0             | II                           |
| EG8           | Male          | 63         | Esophagus    | ESCC        | T2N0M0             | II                           |
| EG14          | Male          | 59         | Esophagus    | ESCC        | T2N0M0             | II                           |
| EG20          | Female        | 46         | Esophagus    | ESCC        | T2N0M0             | II                           |
| EG28          | Male          | 60         | Esophagus    | ESCC        | T2N1M0             | II                           |
| EG30          | Male          | 73         | Esophagus    | ESCC        | T3N0M0             | II                           |
| EG37          | Male          | 69         | Esophagus    | ESCC        | T3N0M0             | II                           |

ESCC: esophageal squamous cell carcinoma.

T: tumor; N: lymph nodes; M: metastasis.
